# Supplementary material for: A novel 1D independent metal–organic nanotube based on cyclotriveratrylene ligand
Source: Royal Society of Chemistry journal article supplement (doi:10.1039/c1ce05316g), 2011-10-12
Supplement: c1ce05316g.pdf [file c1ce05316g.pdf]

Supplementary Material (ESI) for CrystEngComm

**A novel 1D independent metal-organic nanotube based on  
cyclotrimeratrylene ligand**

**Jin-Tao Yu,<sup>a</sup> Junliang Sun,<sup>b</sup> Zhi-Tang Huang<sup>a</sup> and Qi-Yu Zheng<sup>\*,d</sup>**

<sup>a</sup> *Beijing National Laboratory for Molecular Sciences, CAS Key Laboratory of Molecular Recognition and Function, Institute of Chemistry, Chinese Academy of Sciences, Beijing 100190, China.*

<sup>b</sup> *Structural Chemistry and Berzelii Centre EXSELENT on Porous Materials, Stockholm University, SE-106 91 Stockholm, Sweden.*

## I. Structure diagrams of CTV-Cu

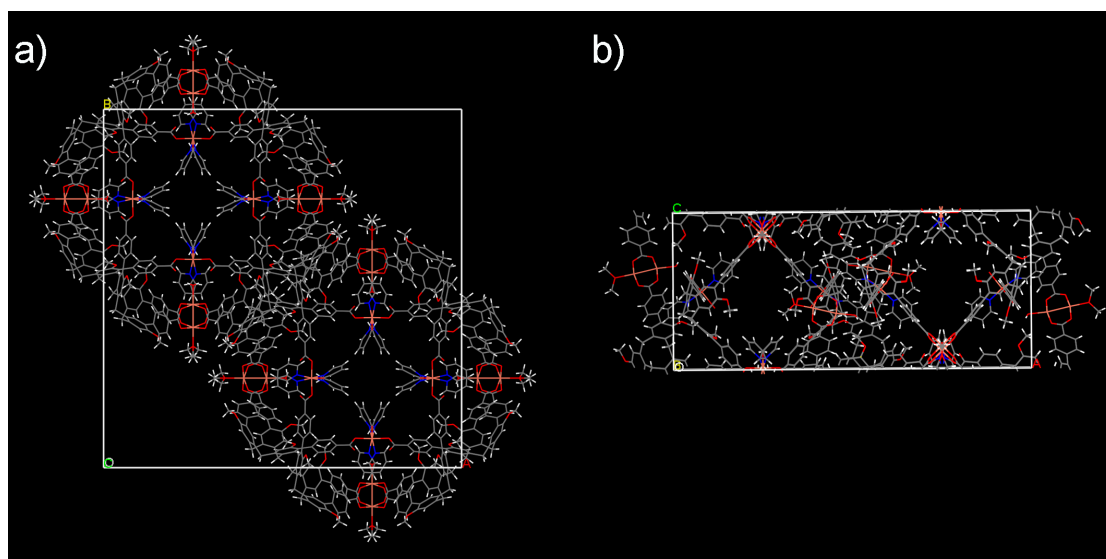

**Fig. S1** The unit cell of CTV-Cu, a) see along the *c* axis. b) see along the *b* axis. (Cu orange; O, red; C, gray; N, blue; H, white).

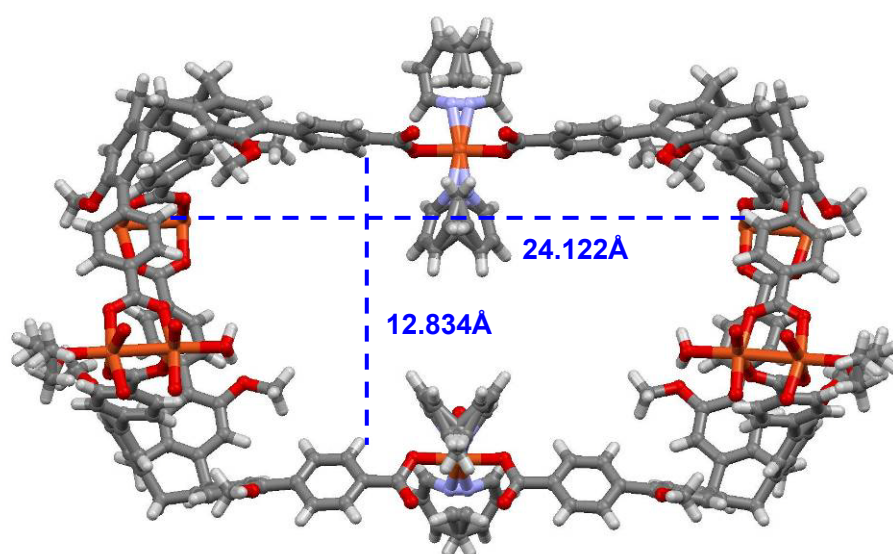

**Fig. S2** The single cuboid cavity of CTV-Cu, see along the *c* axis. (Cu orange; O, red; C, gray; N, blue; H, pale). The cuboid unit has a cavity of  $24.1 \times 12.8$  Å (atom to atom distance).

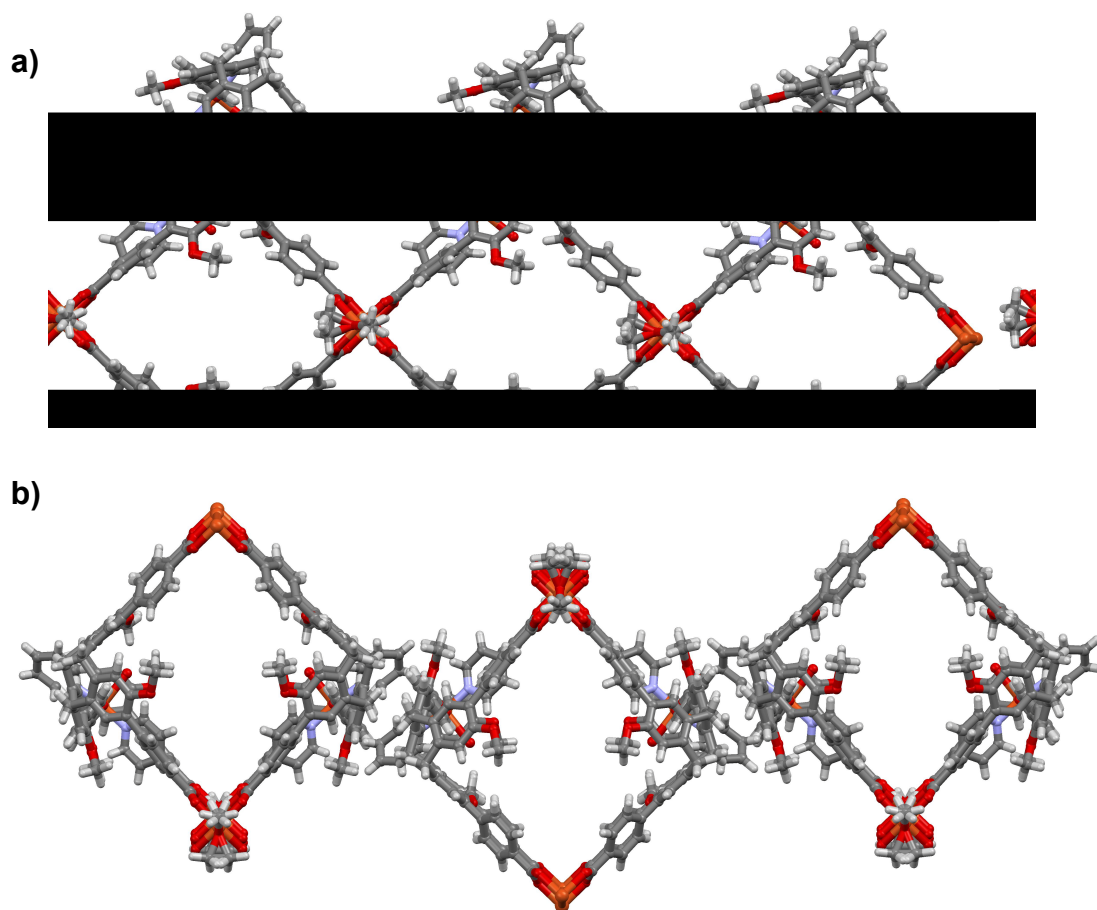

**Fig. S3** Crystal structure of **CTV-Cu**, a) CTV ligands are linked by square bicopper clusters, see from the *a* axis; b) layered structure, see from the *b* axis, there is no covalent bonds nor coordination interactions between those voids. (Cu orange; O, red; C, gray; N, blue; H, pale).

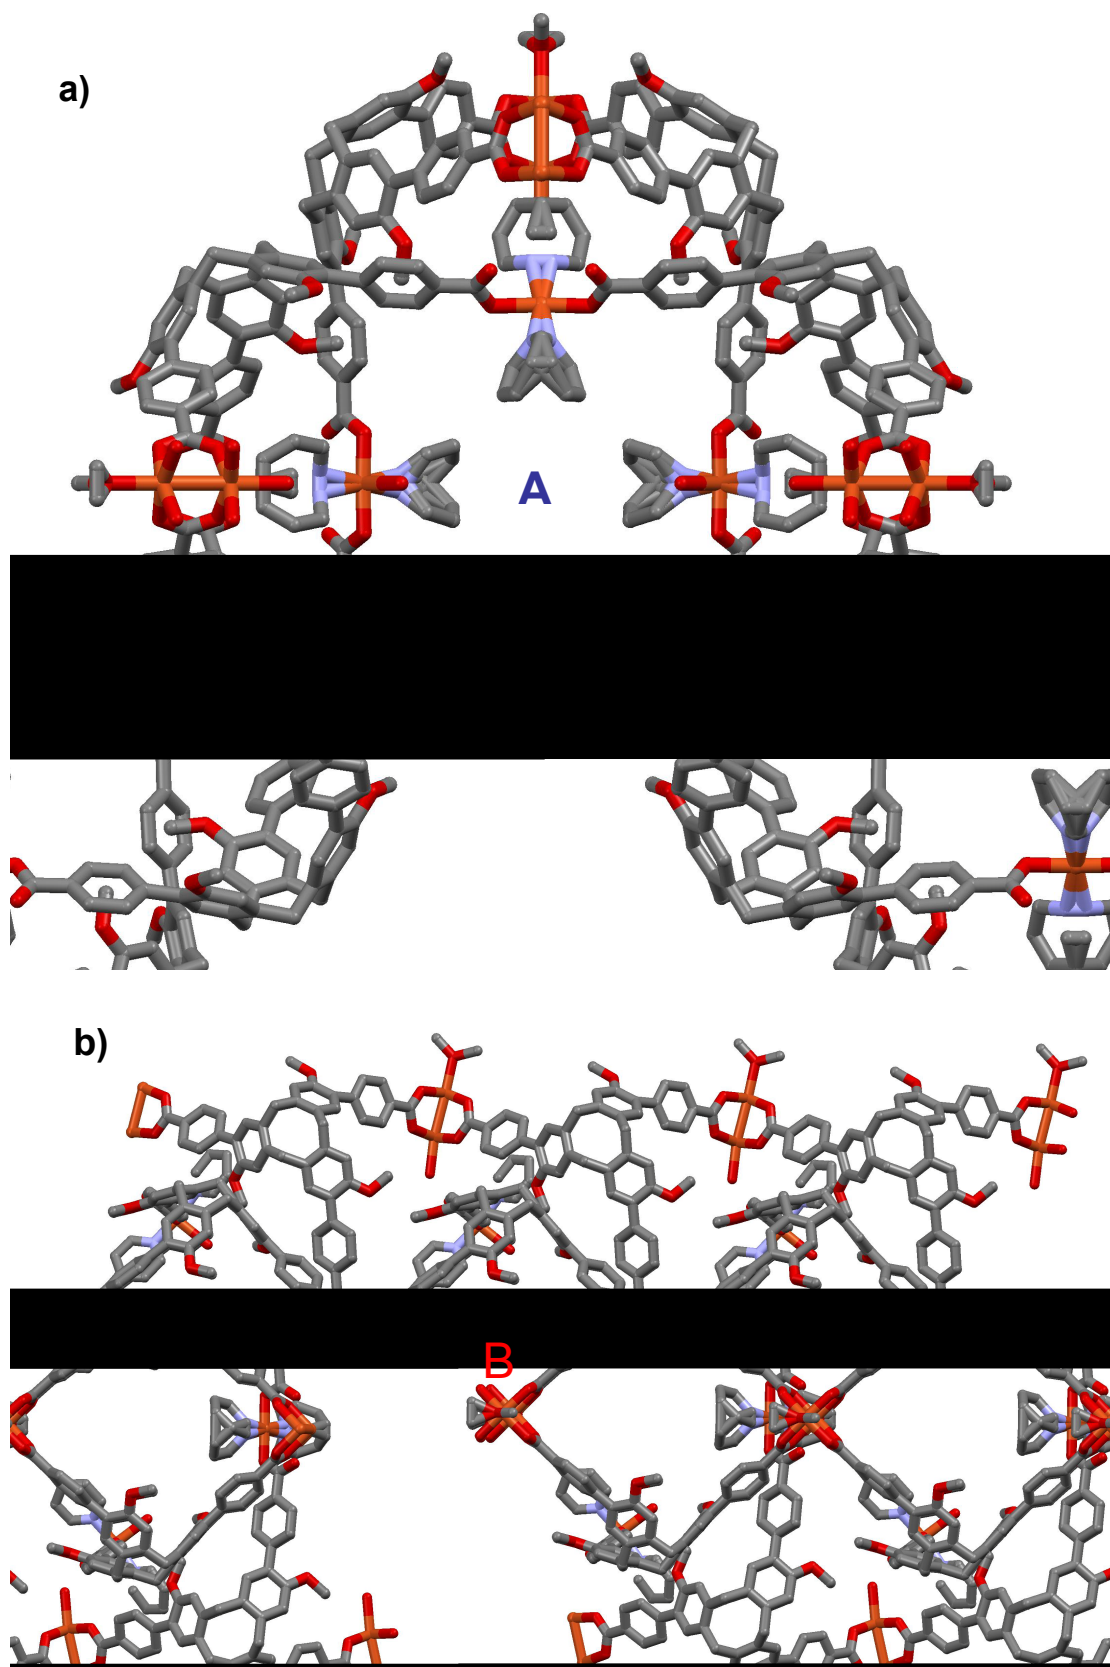

**Fig. S4** Pores structures of CTV-Cu, a) Pore A is surrounded by CTV ligands and Cu<sub>3</sub>, see from the *c* axis; b) structure of pore B, see from the *a* axis (Cu orange; O, red; C, gray; N, blue; all hydrogen atoms are omitted for clarity).



## V. Thermal gravimetric analysis (TGA)

The green block shaped crystals were washed with DEF ( $3 \times 2$  ml) and a little amount of ethanol ( $2 \times 0.3$  ml), dried in air overnight. A crystalline sample (4.105 mg) was heated at a constant rate  $10\text{ }^{\circ}\text{C}/\text{min}$  in air from  $16\text{ }^{\circ}\text{C}$  to  $550\text{ }^{\circ}\text{C}$ . As shown in **Fig. S5**, the guest molecules are steadily lost below  $250\text{ }^{\circ}\text{C}$ , which is ~~34~~36% weight loss, corresponding to the liberation of 9 DEF and 8 water molecules.

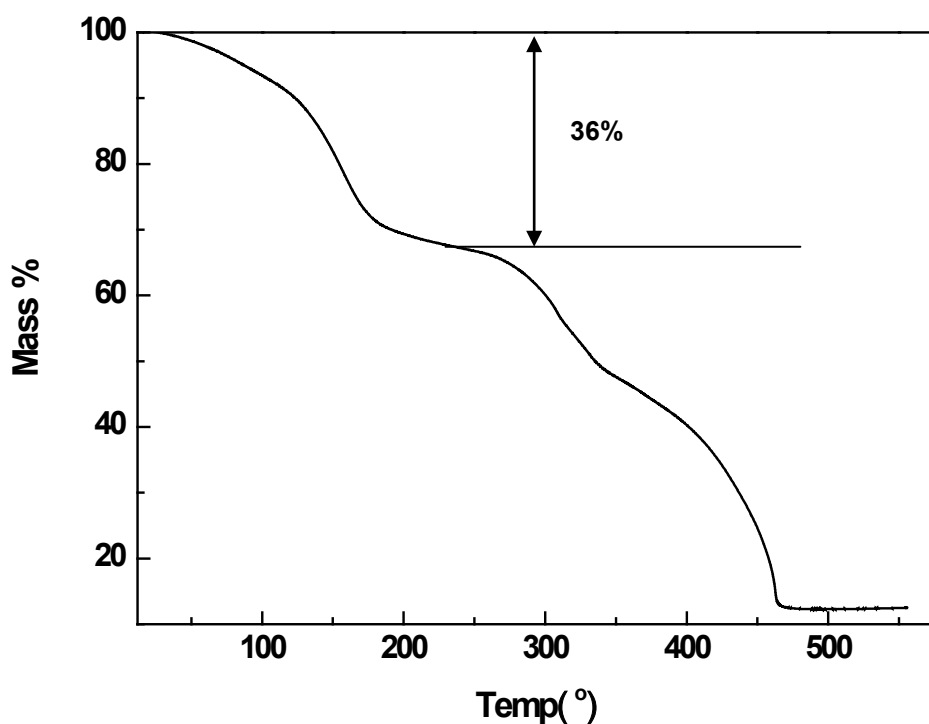

**Fig. S5** TGA measurement of CTV-Cu.

## VII. $^1\text{H}$ -NMR spectra

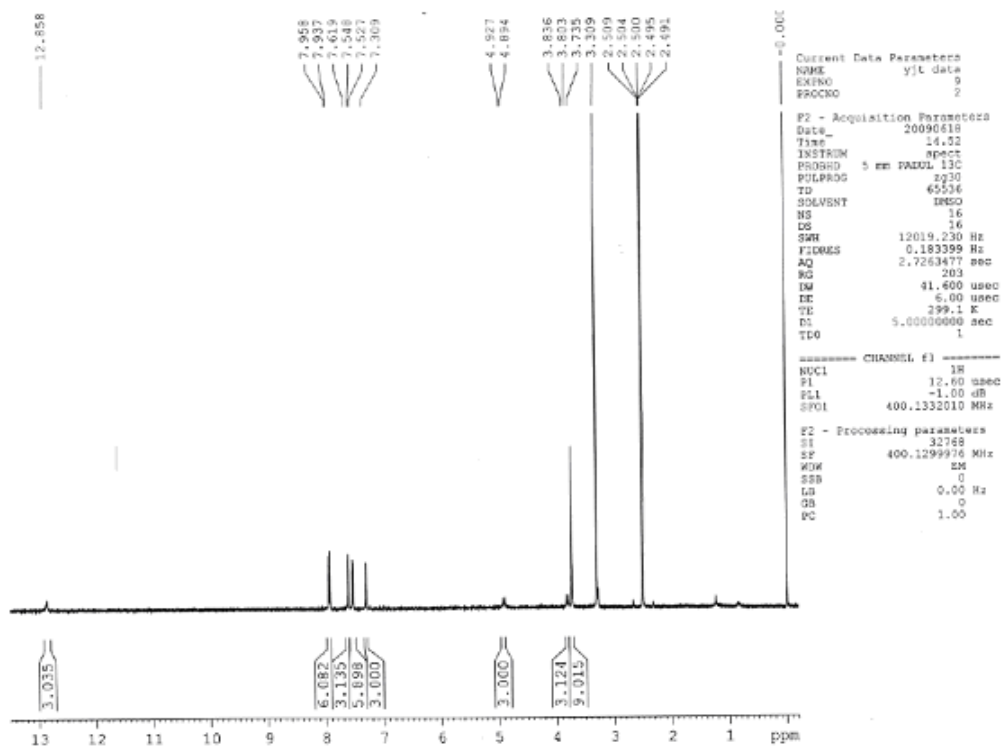

Figure S6  $^1\text{H}$ -NMR spectrum of  $\text{H}_3\text{L}$  in  $\text{DMSO-}d_6$ .
